# Supplementary material for: Partial Substitution of Corn Grain in the Diet with Beet Pulp Reveals Increased Ruminal Acetate Proportion and Circulating Insulin Levels in Korean Cattle Steers
Source: MDPI journal article supplement (doi:10.3390/ani12111419), 2022-05-31
Supplement: s1 [file s1]

1 **Table S1.** Primers, gDNA concentrations, and primer efficiency for the quantification real-time polymerase chain reaction assay

| Microbes                         | gDNA<br>(ng/10 ul) | Forward (F)/<br>Reverse (R) | Primer<br>concentration | Primer sequence               | Reference                                                              | Primer<br>efficiency<br>(%) |
|----------------------------------|--------------------|-----------------------------|-------------------------|-------------------------------|------------------------------------------------------------------------|-----------------------------|
| Total bacteria                   | 1                  | F                           | 0.3 uM                  | CGGCAACGAGCGCAACCC            | Denman and McSweeney, 2006,<br>FEMS Microbiol. Ecol. 58:572.           | 108                         |
|                                  |                    | R                           | 0.3 uM                  | CCATTGTAGCACGTGTGTAGCC        |                                                                        |                             |
| Total protozoa                   | 20                 | F                           | 0.3 uM                  | GCTTTCGWTGGTAGTGTATT          | Sylvester et al., 2004, J. Nutr. 134:<br>3378.                         | 80.3                        |
|                                  |                    | R                           | 0.3 uM                  | CTTGCCCTCYAATCGTWCT           |                                                                        |                             |
| Total fungi                      | 10                 | F                           | 0.3 uM                  | GAGGAAGTAAAAGTCGTAACAAGGTTTC  | Denman and McSweeney, 2006,<br>FEMS Microbiol. Ecol. 58:572.           | 96.1                        |
|                                  |                    | R                           | 0.3 uM                  | CAAATTCACAAAGGGTAGGATGATT     |                                                                        |                             |
| Methanogenic archaea             | 5                  | F                           | 0.5 uM                  | GAGGAAGGAGTGGACGACGGTA        | Ohene-Adjei et al., 2007. Appl.<br>Environ. Microbiol. 73:4609.        | 95.5                        |
|                                  |                    | R                           | 0.5 uM                  | ACGGGCGGTGTGTGCAAG            |                                                                        |                             |
| <i>Anaerovibrio lipolytica</i>   | 10                 | F                           | 0.5 uM                  | TGGGTGTTAGAAATGGATTCTAGTG     | Khafipour et al., 2009, Appl.<br>Environ. Microbiol. 75:7115           | 109                         |
|                                  |                    | R                           | 0.5 uM                  | GCACGTCATTCCGTATTAGCAT        |                                                                        |                             |
| <i>Fibrobacter succinogenes</i>  | 5                  | F                           | 0.5 uM                  | GGAGCGTAGGCGGAGATTCA          | Denman and McSweeney, 2006,<br>FEMS Microbiol. Ecol. 58:572.           | 98.5                        |
|                                  |                    | R                           | 0.5 uM                  | GCCTGCCCCTGAACTATCCA          |                                                                        |                             |
| <i>Ruminobacter amylophilus</i>  | 5                  | F                           | 0.3 uM                  | CTGGGGAGCTGCCTGAAT            | Stevenson and Weimer, 2007,<br>Appl. Microbiol. Biotechnol.<br>75,165. | 91.8                        |
|                                  |                    | R                           | 0.3 uM                  | CATCTGAATGCGACTGGTTG          |                                                                        |                             |
| <i>Ruminococcus albus</i>        | 10                 | F                           | 0.5 uM                  | CCCTAAAAGCAGTCTTAGTTCG        | Koike and Kobayashi, 2001,<br>FEMS Microbiol. Lett. 204:361            | 98.0                        |
|                                  |                    | R                           | 0.5 uM                  | CCTCCTTGCGGTTAGAACA           |                                                                        |                             |
| <i>Ruminococcus flavefaciens</i> | 5                  | F                           | 0.5 uM                  | CGAACGGAGATAATTTGAGTTTACTTAGG | Denman and McSweeney, 2006,<br>FEMS Microbiol. Ecol. 58:572.           | 92.4                        |
|                                  |                    | R                           | 0.5 uM                  | CGGTCTCTGTATGTTATGAGGTATTACC  |                                                                        |                             |
| <i>Streptococcus bovis</i>       | 20                 | F                           | 0.5 uM                  | TTCCTAGAGATAGGAAGTTTCTTCGG    | Sylvester et al., 2004, J. Nutr.<br>134:3378                           | 112                         |
|                                  |                    | R                           | 0.5 uM                  | ATGATGGCAACTAACAATAGGGGT      |                                                                        |                             |
| <i>Succinimonas amylolytica</i>  | 5                  | F                           | 0.5 uM                  | CGTTGGGCGGTCATTGAAAC          | Khafipour et al., 2009, Appl.<br>Environ. Microbiol. 75:7115           | 85.8                        |
|                                  |                    | R                           | 0.5 uM                  | CCTGAGCGTCAGTTACTATCCAGA      |                                                                        |                             |
| <i>Methanobrevibacter</i> spp.   | 10                 | F                           | 0.3 uM                  | CCTCCGCAATGTGAGAAATCGC        | Ramírez-Restrepo et al., 2016,<br>Anim. Feed Sci. Tech. 216: 58.       | 94.6                        |
|                                  |                    | R                           | 0.3 uM                  | TCWCCAGCAATCCCCACAGTT         |                                                                        |                             |

2
